# Supplementary material
Source: publisher site journal article supplement (https://www.dovepress.com/article/315956)
Supplement: Supplementary file 2 [file get_supplementary_file.php]

| **Table S2. Direct comparison of meta-analysis results** | | | | | | |
| --- | --- | --- | --- | --- | --- | --- |
| Outcome index | Comparison category | Number of studies | Heterogeneity | | Meta analysis results | |
| *I2* | *P* | SMD, 95%CI | *P* |
| Visual Analogue Scale |  |  |  |  |  |  |
| Moxibustion vs Western medicine | 4 | 82.10% | 0.001 | **0.624 (1.239, 0.009)** | **0.047** |
| Moxibustion vs Electroacupuncture | 2 | 95.40% | <0.00001 | 0.626( -0.956, 2.209) | 0.438 |
| Western medicine vs Electroacupuncture | 6 | 95.80% | <0.00001 | **1.201(0.169, 2.233)** | **0.023** |
| Electroacupuncture vs Conventional acupuncture | 1 | NA | NA | **-0.859( -1.323, -0.394 )** | **<0.00001** |
| Electroacupuncture vs Warm acupunctrue | 3 | 97.40% | <0.00001 | -1.338( -3.264, 0.587) | 0.173 |
| Conventional acupuncture vs Warm acupunctrue | 3 | 97.60% | <0.00001 | **2.974( 0.798, 5.150 )** | **0.007** |
| Conventional acupuncture vs Acupoint catgut embedding | 1 | NA | NA | 0.357( -0.115, 0.830) | 0.138 |
| Conventional acupuncture vs Sham acupuncture | 1 | NA | NA | **-0.728( -1.354, -0.103)** | **0.023** |
| Western medicine vs Fire needle | 1 | NA | NA | **0.531(0.016, 1.046)** | **0.043** |
| Electroacupuncture vs Fire needle | 1 | NA | NA | -0.092( -0.462, 0.279) | 0.628 |
| Conventional acupuncture vs Fire needle | 3 | 67.50% | 0.046 | **1.22( 0.681,1.760 )** | **<0.00001** |
| Warm acupunctrue vs Fire needle | 3 | 80.90% | 0.005 | **1.432(0.669,2.194 )** | **<0.00001** |
| WOMAC pain score |  |  |  |  |  |  |
| Moxibustion vs Western medicine | 1 | NA | NA | -0.165( -0.672,0.342) | 0.524 |
| Western medicine vs Electroacupuncture | 5 | 82.40% | <0.00001 | 0.235(-0.236, 0.705) | 0.328 |
| Moxibustion vs False moxibustion | 2 | 95.00% | <0.00001 | -0.059(-1.531, 1.412 ) | 0.937 |
| Electroacupuncture vs Conventional acupuncture | 1 | NA | NA | **-1.125(-1.671, -0.579)** | **<0.00001** |
| Western medicine vs Warm acupunctrue | 4 | 62.10% | 0.048 | **0.664( 0.306,1.022 )** | **<0.00001** |
| Electroacupuncture vs Warm acupunctrue | 3 | 65.40% | 0.056 | -0.063( -0.552, 0.426) | 0.801 |
| Conventional acupuncture vs Warm acupunctrue | 1 | NA | NA | **2.922( 2.188,3.656)** | **<0.00001** |
| Conventional acupuncture vs Sham acupuncture | 1 | NA | NA | -0.151(-0.757, 0.454) | 0.624 |
| Electroacupuncture vs Fire needle | 1 | NA | NA | 0.305(-0.067, 0.678 ) | 0.108 |
| Conventional acupuncture vs Fire needle | 1 | NA | NA | **1.502(0.949, 2.054)** | **<0.00001** |
| Warm acupunctrue vs Fire needle | 3 | 88.10% | <0.00001 | **0.956(0.139, 1.774)** | **0.022** |
| WOMAC joint function score |  |  |  |  |  |  |
| Moxibustion vs Western medicine | 1 | NA | NA | **-0.753( -1.277,-0.229 )** | **0.005** |
| Moxibustion vs False moxibustion | 2 | 84.00% | 0.013 | -0.111(-0.912,0.689 ) | 0.785 |
| Western medicine vs Electroacupuncture | 4 | 20.90% | 0.285 | **0.419( 0.209,0.629)** | **<0.00001** |
| Western medicine vs Conventional acupuncture | 1 | NA | NA | **-0.390(-0.670, -0.110)** | **0.006** |
| Western medicine vs Warm acupunctrue | 4 | 75.40% | 0.007 | **0.646(0.201, 1.091)** | **0.004** |
| Electroacupuncture vsConventional acupuncture | 1 | NA | NA | **-0.940(-1.474, -0.406)** | **0.001** |
| Electroacupuncture vs Warm acupunctrue | 3 | 22.10% | 0.277 | 0.201( -0.086,0.488) | 0.17 |
| Electroacupuncture vs Fire needle | 1 | NA | NA | -0.271(-0.643, 0.101) | 0.154 |
| Conventional acupuncture vs Warm acupunctrue | 1 | NA | NA | **4.107( 3.273,4.941)** | **<0.00001** |
| Conventional acupuncture vs Sham acupuncture | 1 | NA | NA | -0.225(-0.832,0.382) | 0.468 |
| Warm acupunctrue vs Fire needle | 2 | 94.70% | <0.00001 | 1.060(-0.636,2.755) | 0.221 |
| WOMAC stiffness score |  |  |  |  |  |  |
| Moxibustion vs Western medicine | 1 | NA | NA | -0.218(-0.726, 0.289) | 0.399 |
| Moxibustion vs False moxibustion | 1 | NA | NA | **-0.541(-1.061,-0.020)** | **0.042** |
| Western medicine vs Electroacupuncture | 5 | 94.50% | <0.00001 | **1.051( 0.148, 1.954 )** | **0.023** |
| Western medicine vs Conventional acupuncture | 1 | NA | NA | **1.954(1.395, 2.044)** | **<0.00001** |
| Western medicine vs Warm acupunctrue | 4 | 79.90% | 0.002 | 0.417(-0.069,0.903) | 0.093 |
| Electroacupuncture vs Conventional acupuncture | 1 | NA | NA | **-0.677(-1.198, -0.156)** | **0.011** |
| Electroacupuncture vs Warm acupunctrue | 3 | 1.30% | 0.363 | **0.671(0.377,0.965)** | **<0.00001** |
| Electroacupuncture vs Fire needle | 1 | NA | NA | 0.039( -0.332,0.409) | 0.838 |
| Conventional acupuncture vs Warm acupunctrue | 1 | NA | NA | **3.278(2.496,4.060)** | **<0.00001** |
| Conventional acupuncture vs Fire needle | 1 | NA | NA | **1.485(0.934, 2.036)** | **<0.00001** |
| Warm acupunctrue vs Fire needle | 2 | 88.80% | 0.003 | 0.305(-0.765,1.375) | 0.576 |
| Abbreviation：NA,Data unavailable;SMD,Standard Mean Difference;CI, Confidence interval. The bold font indicates that there was a statistically significant difference between the two treatments. | | | | | | |
